# Supplementary material for: Olfactory dysfunction in the 3xTg-AD model of Alzheimer’s disease
Source: PubMed Central journal article supplement — IBRO Neurosci Rep. 2021 Jan 8;10:51–61. doi: 10.1016/j.ibneur.2020.12.004 (PMC8019944; doi:10.1016/j.ibneur.2020.12.004), 2021-01-08
Supplement: mmc1.pdf [file mmc1.pdf]

**Supplementary Table 1:** Tests for Normality of BFT Data for all 52-Week-Old Animals (in parentheses is the SE, or standard error).

|                       |                | <b>13 weeks</b> | <b>26 weeks</b> | <b>39 weeks</b> | <b>52 weeks</b> |
|-----------------------|----------------|-----------------|-----------------|-----------------|-----------------|
| <b>3xTg-AD Male</b>   | Shapiro-Wilk's | p>0.05          | p<0.05          | p>0.05          | p<0.05          |
|                       | Skewness       | 0.83 (0.72)     | 1.46 (0.72)     | 1.40 (0.72)     | 2.39 (0.72)     |
|                       | Kurtosis       | 0.57 (1.40)     | 1.34 (1.40)     | 2.08 (1.40)     | 6.38 (1.40)     |
| <b>3xTg-AD Female</b> | Shapiro-Wilk's | p>0.05          | p<0.05          | p<0.05          | p<0.05          |
|                       | Skewness       | 0.71 (0.79)     | 2.31 (0.79)     | 1.16 (0.79)     | -0.31 (0.79)    |
|                       | Kurtosis       | 1.48 (1.59)     | 5.56 (1.59)     | -0.89 (1.59)    | -2.64 (1.59)    |
| <b>129 Male</b>       | Shapiro-Wilk's | p<0.05          | p<0.05          | p<0.05          | p<0.05          |
|                       | Skewness       | 1.21 (0.49)     | 3.43 (0.49)     | 2.37 (0.49)     | 1.13 (0.49)     |
|                       | Kurtosis       | 0.87 (0.95)     | 12.81 (0.95)    | 6.69 (0.95)     | 0.11 (0.95)     |
| <b>129 Female</b>     | Shapiro-Wilk's | p>0.05          | p<0.05          | p<0.05          | p<0.05          |
|                       | Skewness       | 0.80 (0.60)     | 2.18 (0.60)     | 1.48 (0.60)     | 2.96 (0.60)     |
|                       | Kurtosis       | 0.54 (1.15)     | 6.10 (1.15)     | 1.65 (1.15)     | 9.73 (1.15)     |
| <b>C57BL/6 Male</b>   | Shapiro-Wilk's | p<0.05          | p<0.05          | p<0.05          | p<0.05          |
|                       | Skewness       | 1.51 (0.60)     | 1.64 (0.60)     | 3.05 (0.60)     | 3.41 (0.60)     |
|                       | Kurtosis       | 0.72 (1.15)     | 1.46 (1.15)     | 10.25 (1.15)    | 12.16 (1.15)    |
| <b>C57BL/6 Female</b> | Shapiro-Wilk's | p<0.05          | p<0.05          | p<0.05          | p<0.05          |
|                       | Skewness       | 1.37 (0.58)     | 1.04 (0.58)     | 1.17 (0.58)     | 2.26 (0.58)     |
|                       | Kurtosis       | 0.86 (1.12)     | -0.09 (1.12)    | 0.07 (1.12)     | 4.78 (1.12)     |
| <b>Hybrid Male</b>    | Shapiro-Wilk's | p<0.05          | p>0.05          | p>0.05          | p<0.05          |
|                       | Skewness       | 1.79 (0.64)     | 0.85 (0.64)     | 0.62 (0.64)     | 1.41 (0.64)     |
|                       | Kurtosis       | 2.85 (1.23)     | 0.68 (1.23)     | -0.80 (1.23)    | 0.88 (1.23)     |
| <b>Hybrid Female</b>  | Shapiro-Wilk's | p<0.05          | p>0.05          | p<0.05          | p>0.05          |
|                       | Skewness       | 2.32 (0.75)     | 0.87 (0.75)     | 2.54 (0.75)     | 0.79 (0.75)     |
|                       | Kurtosis       | 5.82 (1.48)     | -1.07 (1.48)    | 6.72 (1.48)     | -0.77 (1.48)    |
